# Supplementary material
Source: Preprints.org preprint supplement (doi:10.20944/preprints202103.0433.v1)
Supplement: Supplementary file 1 [file supplementary]

Special Issue "Progress on Seasonal and Pandemic Influenza Vaccines"

Quantifying the Persistence of Vaccine-related T cell Epitopes in Circulating Swine Influenza A Strains from 2013-2017

Swan Tan 1,2, Andres H. Gutiérrez 4, Philip C. Gauger 3, Tanja Opriessnig 3, Justin Bahl1,2, Leonard Moise 2,4 and Anne S. De Groot 2,4*

1 Department of Infectious Diseases, University of Georgia, Athens, GA, USA

2 Center for Vaccines and Immunology, University of Georgia, Athens, GA, USA

3 Veterinary Diagnostic and Production Animal Medicine, College of Veterinary Medicine, Iowa State University

4 EpiVax Inc., Providence, RI, USA

***** Correspondence: dr.annie.degroot@gmail.com; Tel.: +1-401-952-4227 (R.I.)

Received: date; Accepted: date; Published: date

**Supplementary Materials**


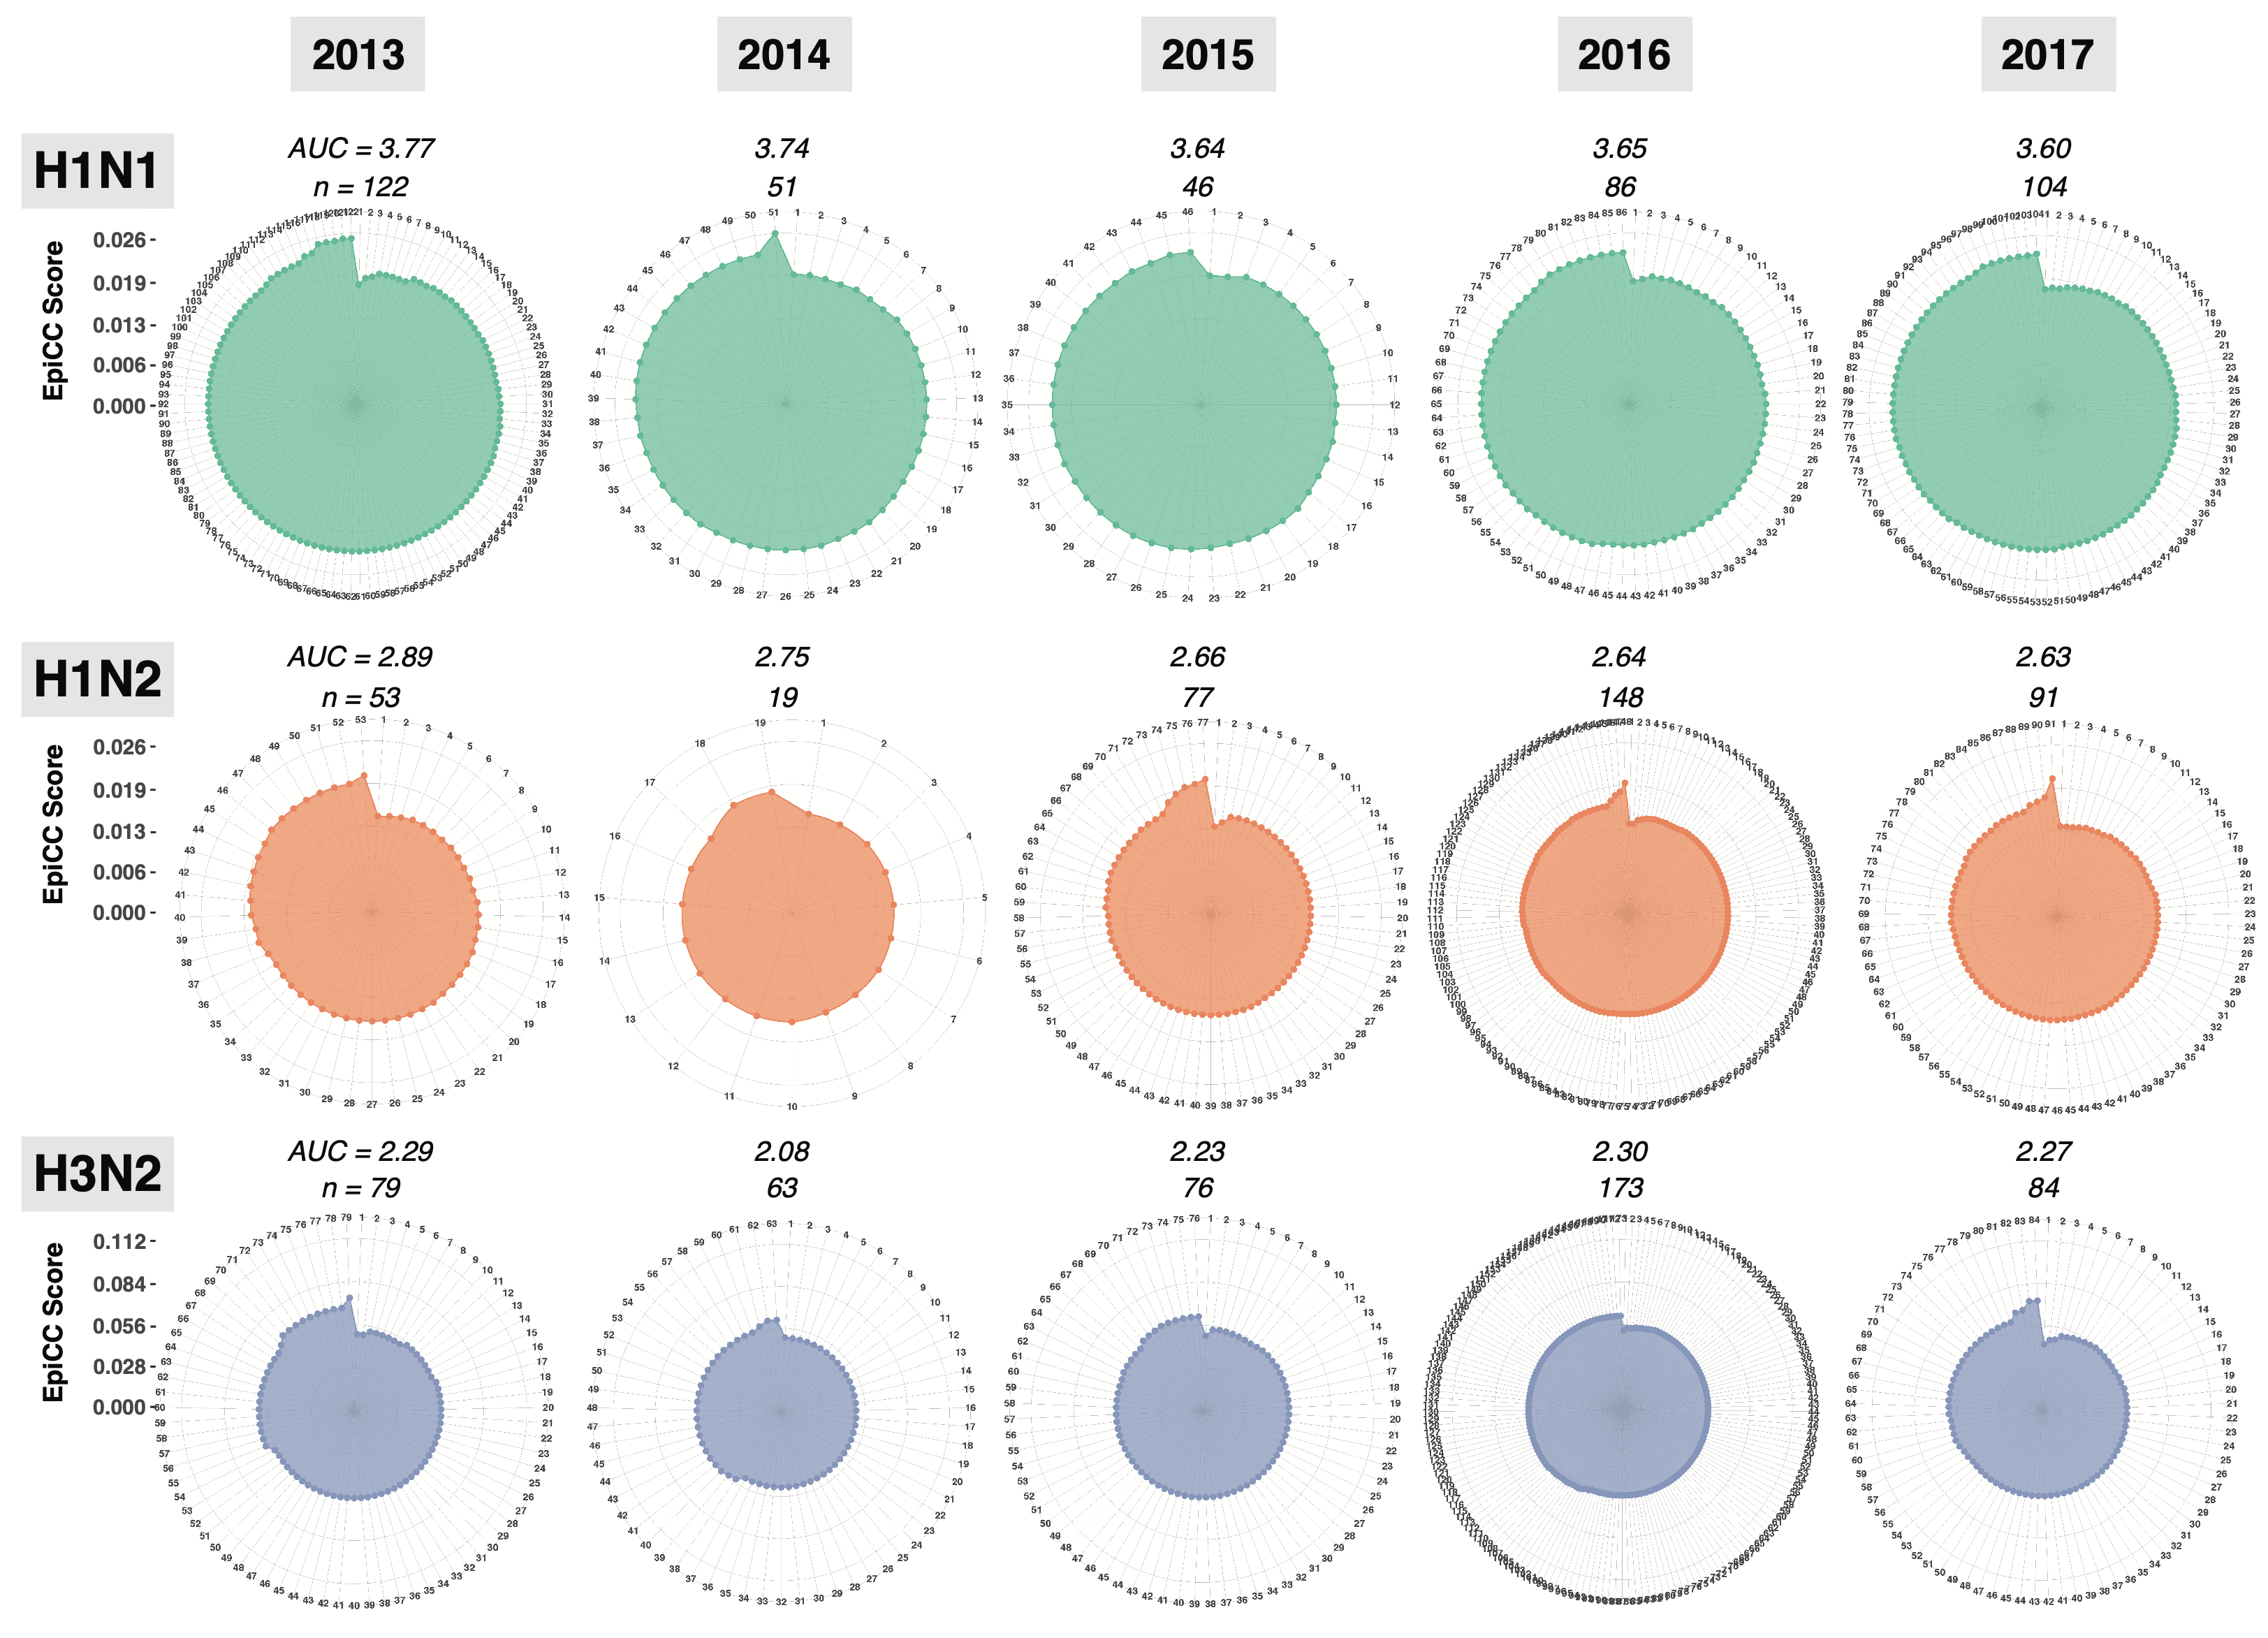

**Figure S1: Radar plots showing degree of class I T cell epitope conservation between the conserved epitopes in the MEpiV for the HA antigen and epitopes contained in HA from circulating strains for each year.** The radar plots show T cell epitope conservation between the T cell-directed multi-epitope DNA vaccine against each swine IAV circulating strain (axes of radar plot) over five years. The strains were sorted from lowest to highest EpiCC scores. The multi-epitope DNA vaccine is predicted to drive better CD4 immune response based on data published in Gutierrez 2017 and Hewitt 2019.

**Figure S2: Line plots showing the degree of conservation by antigens, subtypes and years.** The degree of conservation (AUC) is normalized to ease direct comparison by internal antigens, subtypes, years and T cell epitopes classes.

**Table S1. MEpiV vaccine class I and II peptides.**

| **Antigen** | **Class I peptide** | **Class II peptide** |
| --- | --- | --- |
| PB2 | GTEKLTITY | - |
| PB1 | VSDGGPNLY | MMGMFNMLSTVLGVSI |
| DTVNRTHQY | YRYGFVANFSMELPSFGVSG |
| PA | QVSRPMFLY | EVHIYYLEKANKIKSEKTHIHIF |
|  | RSKFLLMDALKLSIEDP |
| HA | GMVDGWYGY | YEELREQLSSVSSFER |
| GMIDGWYGY | STRIYQILAIYSTVASSLVLV |
| SVKNGTYDY | GDKITFEATGNLVVPRY |
| RIYQILAIY | VPRYAFAMERNAGSGIIIS |
| NADTLCIGY |  |
| TSADQQSLY |  |
| LSTASSWSY |  |
| ITIGKCPKY |  |
| NP | AFDERRNKY | IEDLIFLARSALILRGSVAHKSCLP |
| CTELKLSDY | TRGVQIASNENVETMDSNTLELR |
| ASQGTKRSY | IDPFKLLQNSQVVSLMRP |
| NA | KSCINRCFY | CRTFFLTQGALLNDKH |
| DTVHDRTPY | SVVSVKLAGNSSLCPV |
| GTIKDRSPY | NQTYVNISNTNFAAGQSVVSVKL |
| EMNAPNYHY | MANLILQIGNIISIWISHS |
| ELDAPNYHY |  |
| EICPKLAEY |  |
| M1 | SLLTEVETY | TRQMVHAMRTIGTHPSSSA |
| LTEVETYVL | SCMGLIYNRMGTVTTEAAFGLVC |
| DLLENLQAY | TYVLSIIPSGPLKAEIAQRLESV |
| LASCMGLIY |  |
| NTDLEALME |  |
| NMDKAVKLY |  |
| GAKEVALSY |  |
| NS2 | - | FEQITFMQALQLLLEVE |
| FQDILMRMSKMQLGSSSE |

**Table S2. EpiCC scores of all swine IAV circulating strains** (in Excel).

**Table S3. List of swine IAV circulating strains that have the most and the least conserved class I (A) and II (B) epitopes.**

| **(A) Class I most conserved strains against the vaccine. Conservation at 75% (21/28)** | | |
| --- | --- | --- |
| **No.** | **Strain Name** | **Subtype** |
| 1  2  3  4  5  6  7  8  9  10  11  12  13  14  15  16  17  18  19  20  21  22  23  24  25  26  27  28  29  30  31  32  33  34  35  36  37  38  39  40  41  42 | A/Swine/Arkansas/D0386/2013  A/Swine/Minnesota/A01392911/2013  A/Swine/Minnesota/A01394863/2013  A/Swine/Minnesota/MT1301S79/2013  A/Swine/Ohio/A01349978/2013  A/Swine/Ohio/A01432602/2013  A/Swine/Illinois/A01490609/2014  A/Swine/Illinois/A01492501/2014  A/Swine/Illinois/A01493472/2014  A/Swine/Iowa/A01410472/2014  A/Swine/Kansas/A01410327/2014  A/Swine/Minnesota/A01491447/2014  A/Swine/Minnesota/A01491704/2014  A/Swine/Missouri/A01492887/2014  A/Swine/Nebraska/A01366774/2014  A/Swine/Nebraska/A01491300/2014  A/Swine/Nebraska/A01492657/2014  A/Swine/Nebraska/A01566172/2014  A/Swine/North Carolina/A01410573/2014  A/Swine/Oklahoma/A01410195/2014  A/Swine/Oklahoma/A01476227/2014  A/Swine/Indiana/A01260972/2015  A/Swine/Illinois/A01729364/2016  A/Swine/Illinois/A01749912/2016  A/Swine/Illinois/A01749913/2016  A/Swine/Illinois/A01749914/2016  A/Swine/Illinois/A01775937/2016  A/Swine/Illinois/A01776206/2016  A/Swine/Illinois/A01777039/2016  A/Swine/Illinois/A01778882/2016  A/Swine/Indiana/16TOSU4933/2016  A/Swine/Indiana/A01671620/2016  A/Swine/Indiana/A01812242/2016  A/Swine/Iowa/A01781047/2016  A/Swine/Iowa/A01782230/2016  A/Swine/Missouri/A01775100/2016  A/Swine/Missouri/A01775109/2016  A/Swine/Nebraska/A01783006/2016  A/Swine/Ohio/A01104092/2016  A/Swine/Tennessee/A01894329/2016  A/Swine/Iowa/A02214835/2017  A/Swine/Kansas/A01378027/2017 | H1N1 |
| 1  2 | A/Swine/Indiana/16TOSU0646/2016  A/Swine/Michigan/A01259077/2017 | H1N2 |
| **Class I least conserved strains against the vaccine.**  **Conservation at 46.4% (13/28)** | | |
| 1  2  3  4 | A/Swine/Kansas/A01377649/2015 A/Swine/Missouri/A01840324/2015 A/Swine/Florida/UF1/2017 A/Swine/Missouri/A02136832/2017 | H3N2 |

| **(B) Class II most conserved strains against the vaccine. Conservation at 32.3% (74/229)** | | |
| --- | --- | --- |
| **No.** | **Strain Name** | **Subtype** |
| 1  2  3  4 | A/Swine/Arkansas/D0386/2013  A/Swine/Minnesota/A01381276/2013  A/Swine/Ohio/A01349978/2013  A/Swine/Ohio/A01432602/2013 | H1N1 |
| **Class II least conserved strains against the vaccine.**  **Conservation at 15.3% (35/229)** | | |
| 1  2 | A/Swine/Nebraska/A01493915/2014  A/Swine/Florida/UF1/2017 | H3N2 |
